# Supplementary material for: A systematic review investigating the cumulative incidence of chronic kidney disease in young adults with impaired glucose tolerance
Source: PubMed Central journal article supplement (PMC4433064; doi:10.1186/s13643-015-0059-6), 2015-05-13
Supplement: 13643_2015_59_MOESM1_ESM.pdf [file 13643_2015_59_MOESM1_ESM.pdf]

**Additional file 1****Electronic search of Medline for CKD outcomes**

| <b>Count</b> | <b>Searches</b>                    | <b>Results</b> |
|--------------|------------------------------------|----------------|
| 1            | exp Renal Insufficiency Chronic/   | 84840          |
| 2            | chronic kidney disease.mp.         | 18247          |
| 3            | chronic kidney disease\$.mp.       | 18745          |
| 4            | exp Kidney Failure, Chronic/       | 78448          |
| 5            | chronic kidney failure.mp.         | 975            |
| 6            | chronic kidney failure\$.mp.       | 976            |
| 7            | chronic renal failure.mp.          | 20307          |
| 8            | chronic renal failure\$.mp.        | 20319          |
| 9            | end stage kidney disease.mp.       | 997            |
| 10           | end stage kidney disease\$.mp.     | 1005           |
| 11           | esrd.mp.                           | 9767           |
| 12           | esrd\$.mp.                         | 9769           |
| 13           | chronic kidney insufficiency.mp.   | 195            |
| 14           | chronic kidney insufficiency\$.mp. | 195            |
| 15           | end stage renal disease.mp.        | 19454          |
| 16           | end stage renal disease\$.mp.      | 19625          |
| 17           | end stage renal failure.mp.        | 4888           |
| 18           | end stage renal failure\$.mp.      | 4891           |
| 19           | kidney failure.mp.                 | 81179          |
| 20           | kidney failure\$.mp.               | 81828          |
| 21           | renal insufficiency/               | 10919          |
| 22           | renal failure.mp.                  | 71184          |
| 23           | renal failure\$.mp.                | 71271          |
| 24           | kidney insufficiency.mp.           | 577            |
| 25           | kidney insufficiency\$.mp.         | 577            |
| 26           | exp renal dialysis/                | 93204          |
| 27           | renal dialysis.mp.                 | 74276          |
| 28           | renal dialysis\$.mp.               | 74276          |
| 29           | extracorporeal dialysis.mp.        | 161            |
| 30           | extracorporeal dialysis\$.mp.      | 162            |
| 31           | hemodialysis.mp.                   | 47033          |
| 32           | hemodialysis\$.mp.                 | 47039          |
| 33           | haemodialysis.mp.                  | 11565          |
| 34           | haemodialysis\$.mp.                | 11576          |
| 35           | exp peritoneal dialysis/           | 22761          |
| 36           | peritoneal dialysis.mp.            | 26208          |
| 37           | peritoneal dialysis\$.mp.          | 26210          |
| 38           | renal disease.mp.                  | 39428          |
| 39           | renal disease\$.mp.                | 43692          |
| 40           | exp kidney diseases/               | 414228         |
| 41           | kidney disease.mp.                 | 30990          |

| Count | Searches                                                                                                                                                                                                                                                                                                                                                                                                                                              | Results |
|-------|-------------------------------------------------------------------------------------------------------------------------------------------------------------------------------------------------------------------------------------------------------------------------------------------------------------------------------------------------------------------------------------------------------------------------------------------------------|---------|
| 42    | kidney disease\$.mp.                                                                                                                                                                                                                                                                                                                                                                                                                                  | 103750  |
| 43    | nephropathy.mp.                                                                                                                                                                                                                                                                                                                                                                                                                                       | 37719   |
| 44    | nephropathy\$.mp.                                                                                                                                                                                                                                                                                                                                                                                                                                     | 37721   |
| 45    | exp diabetic nephropathies/                                                                                                                                                                                                                                                                                                                                                                                                                           | 19707   |
| 46    | diabetic nephropathy.mp.                                                                                                                                                                                                                                                                                                                                                                                                                              | 11909   |
| 47    | diabetic nephropathy\$.mp.                                                                                                                                                                                                                                                                                                                                                                                                                            | 11909   |
| 48    | exp kidney transplantation/                                                                                                                                                                                                                                                                                                                                                                                                                           | 79900   |
| 49    | kidney transplantation.mp.                                                                                                                                                                                                                                                                                                                                                                                                                            | 81478   |
| 50    | kidney transplantation\$.mp.                                                                                                                                                                                                                                                                                                                                                                                                                          | 81539   |
| 51    | renal transplant.mp.                                                                                                                                                                                                                                                                                                                                                                                                                                  | 18888   |
| 52    | renal transplant\$.mp.                                                                                                                                                                                                                                                                                                                                                                                                                                | 36596   |
| 53    | exp dialysis/                                                                                                                                                                                                                                                                                                                                                                                                                                         | 22124   |
| 54    | dialysis.mp.                                                                                                                                                                                                                                                                                                                                                                                                                                          | 132315  |
| 55    | dialysis\$.mp.                                                                                                                                                                                                                                                                                                                                                                                                                                        | 132329  |
| 56    | exp renal insufficiency/                                                                                                                                                                                                                                                                                                                                                                                                                              | 127094  |
| 57    | renal insufficiency.mp.                                                                                                                                                                                                                                                                                                                                                                                                                               | 33560   |
| 58    | renal insufficiency\$.mp.                                                                                                                                                                                                                                                                                                                                                                                                                             | 33571   |
| 59    | EGFR.mp.                                                                                                                                                                                                                                                                                                                                                                                                                                              | 27296   |
| 60    | EGFR\$.mp.                                                                                                                                                                                                                                                                                                                                                                                                                                            | 27669   |
| 61    | exp glomerular filtration rate/                                                                                                                                                                                                                                                                                                                                                                                                                       | 33096   |
| 62    | glomerular filtration rate.mp.                                                                                                                                                                                                                                                                                                                                                                                                                        | 42765   |
| 63    | glomerular filtration rate\$.mp.                                                                                                                                                                                                                                                                                                                                                                                                                      | 43111   |
| 64    | exp creatinine/                                                                                                                                                                                                                                                                                                                                                                                                                                       | 46991   |
| 65    | creatinine.mp.                                                                                                                                                                                                                                                                                                                                                                                                                                        | 95418   |
| 66    | creatinine\$.mp.                                                                                                                                                                                                                                                                                                                                                                                                                                      | 95673   |
| 67    | serum creatinine.mp.                                                                                                                                                                                                                                                                                                                                                                                                                                  | 26670   |
| 68    | serum creatinine\$.mp.                                                                                                                                                                                                                                                                                                                                                                                                                                | 26781   |
| 69    | serum creatinine clearance.mp.                                                                                                                                                                                                                                                                                                                                                                                                                        | 53      |
| 70    | serum creatinine clearance\$.mp.                                                                                                                                                                                                                                                                                                                                                                                                                      | 58      |
| 71    | exp albuminuria/                                                                                                                                                                                                                                                                                                                                                                                                                                      | 12045   |
| 72    | albuminuria\$.mp.                                                                                                                                                                                                                                                                                                                                                                                                                                     | 14614   |
| 73    | exp proteinuria/                                                                                                                                                                                                                                                                                                                                                                                                                                      | 32445   |
| 74    | proteinuria.mp.                                                                                                                                                                                                                                                                                                                                                                                                                                       | 36905   |
| 75    | proteinuria\$.mp.                                                                                                                                                                                                                                                                                                                                                                                                                                     | 36921   |
| 76    | 1 or 2 or 3 or 4 or 5 or 6 or 7 or 8 or 9 or 10 or 11 or 12 or 13 or 14 or 15 or 16 or 17 or 18 or 19 or 20 or 21 or 22 or 23 or 24 or 25 or 26 or 27 or 28 or 29 or 30 or 31 or 32 or 33 or 34 or 35 or 36 or 37 or 38 or 39 or 40 or 41 or 42 or 43 or 44 or 45 or 46 or 47 or 48 or 49 or 50 or 51 or 52 or 53 or 54 or 55 or 56 or 57 or 58 or 59 or 60 or 61 or 62 or 63 or 64 or 65 or 66 or 67 or 68 or 69 or 70 or 71 or 72 or 73 or 74 or 75 | 683333  |
| 77    | exp diabetes mellitus, type 2/                                                                                                                                                                                                                                                                                                                                                                                                                        | 87630   |
| 78    | diabetes mellitus type 2.mp.                                                                                                                                                                                                                                                                                                                                                                                                                          | 87782   |
| 79    | type 2 diabetes.mp.                                                                                                                                                                                                                                                                                                                                                                                                                                   | 60366   |
| 80    | type 2 diabetes\$.mp.                                                                                                                                                                                                                                                                                                                                                                                                                                 | 60434   |

| Count | Searches                                           | Results |
|-------|----------------------------------------------------|---------|
| 81    | niddm.mp.                                          | 6673    |
| 82    | niddm\$.mp.                                        | 6704    |
| 83    | exp diabetes insipidus/                            | 7011    |
| 84    | diabetes insipidus.mp.                             | 8589    |
| 85    | diabetes insipidus\$.mp.                           | 8589    |
| 86    | 77 or 78 or 79 or 80 or 81 or 82 or 83 or 84 or 85 | 113193  |
| 87    | exp glucose intolerance/                           | 6360    |
| 88    | impaired glucose tolerance.mp.                     | 8065    |
| 89    | impaired glucose tolerance\$.mp.                   | 8066    |
| 90    | glucose intolerance.mp.                            | 11300   |
| 91    | glucose intolerance\$.mp.                          | 11302   |
| 92    | exp prediabetic state/                             | 3852    |
| 93    | prediabetes.mp.                                    | 1633    |
| 94    | prediabetic state.mp.                              | 4004    |
| 95    | prediabetic state\$.mp.                            | 4053    |
| 96    | exp blood glucose/                                 | 130285  |
| 97    | blood glucose.mp.                                  | 147811  |
| 98    | blood glucose\$.mp.                                | 147841  |
| 99    | glucose metabolism.mp.                             | 23463   |
| 100   | glucose metabolism\$.mp.                           | 23713   |
| 101   | exp glucose tolerance test/                        | 29397   |
| 102   | glucose tolerance test.mp.                         | 33799   |
| 103   | glucose tolerance test\$.mp.                       | 34976   |
| 104   | OGTT.mp.                                           | 5382    |
| 105   | OGTT\$.mp.                                         | 5481    |
| 106   | exp Hyperglycemia/                                 | 26636   |
| 107   | hyperglycemia.mp.                                  | 37642   |
| 108   | hyperglycemia\$.mp.                                | 37682   |
| 109   | hyperglycaemia.mp.                                 | 6827    |
| 110   | hyperglycaemia\$.mp.                               | 6840    |
| 111   | impaired fasting glucose.mp.                       | 2336    |
| 112   | impaired fasting glucose\$.mp.                     | 2336    |
| 113   | postprandial hyperglycemia.mp.                     | 911     |
| 114   | postprandial hyperglycaemia.mp.                    | 283     |
| 115   | exp hemoglobin a, glycosylated/                    | 23254   |
| 116   | hemoglobin a, glycosylated.mp.                     | 23255   |
| 117   | hemoglobin a, glycosylated\$.mp.                   | 23255   |
| 118   | Haemoglobin a, glycosylated.mp.                    | 1       |
| 119   | HbA1c.mp.                                          | 13678   |
| 120   | HbA1c\$.mp.                                        | 13741   |
| 121   | glycemic abnormality.mp.                           | 7       |
| 122   | Glycaemic abnormality.mp.                          | 0       |
| 123   | Fasting plasma glucose.mp.                         | 7250    |

| Count | Searches                                                                                                                                                                                                                                                  | Results |
|-------|-----------------------------------------------------------------------------------------------------------------------------------------------------------------------------------------------------------------------------------------------------------|---------|
| 124   | Fasting plasma glucose\$.mp.                                                                                                                                                                                                                              | 7259    |
| 125   | 87 or 88 or 89 or 90 or 91 or 92 or 93 or 94 or 95 or 96 or 97 or 98 or 99 or 100 or 101 or 102 or 103 or 104 or 105 or 106 or 107 or 108 or 109 or 110 or 111 or 112 or 113 or 114 or 115 or 116 or 117 or 118 or 119 or 120 or 121 or 122 or 123 or 124 | 223393  |
| 126   | 76 and 86 and 125                                                                                                                                                                                                                                         | 4367    |
| 127   | exp cohort studies/                                                                                                                                                                                                                                       | 1387399 |
| 128   | cohort\$.tw.                                                                                                                                                                                                                                              | 263907  |
| 129   | controlled clinical trial.pt.                                                                                                                                                                                                                             | 88411   |
| 130   | epidemiologic methods/                                                                                                                                                                                                                                    | 29569   |
| 131   | exp case-control studies/                                                                                                                                                                                                                                 | 688110  |
| 132   | (case\$ and control\$).tw.                                                                                                                                                                                                                                | 311313  |
| 133   | 127 or 128 or 129 or 130 or 131 or 132                                                                                                                                                                                                                    | 1909067 |
| 134   | cohort studies/                                                                                                                                                                                                                                           | 170386  |
| 135   | longitudinal studies/                                                                                                                                                                                                                                     | 87299   |
| 136   | follow-up studies/                                                                                                                                                                                                                                        | 504746  |
| 137   | prospective studies/                                                                                                                                                                                                                                      | 376036  |
| 138   | retrospective studies/                                                                                                                                                                                                                                    | 512412  |
| 139   | cohort.ti,ab.                                                                                                                                                                                                                                             | 239106  |
| 140   | longitudinal.ti,ab.                                                                                                                                                                                                                                       | 132074  |
| 141   | prospective.ti,ab.                                                                                                                                                                                                                                        | 339467  |
| 142   | retrospective.ti,ab.                                                                                                                                                                                                                                      | 264289  |
| 143   | Case-Control Studies/                                                                                                                                                                                                                                     | 188791  |
| 144   | Control Groups/                                                                                                                                                                                                                                           | 1435    |
| 145   | Matched-Pair Analysis/                                                                                                                                                                                                                                    | 4154    |
| 146   | retrospective studies/                                                                                                                                                                                                                                    | 512412  |
| 147   | ((case* adj5 control*) or (case adj3 comparison*) or control group*).ti,ab.                                                                                                                                                                               | 374925  |
| 148   | 127 or 128 or 129 or 130 or 131 or 132 or 133 or 134 or 135 or 136 or 137 or 138 or 139 or 140 or 141 or 142 or 143 or 144 or 145 or 146 or 147                                                                                                           | 2266708 |
| 149   | 126 and 148                                                                                                                                                                                                                                               | 1552    |
| 150   | Remove duplicates from 149                                                                                                                                                                                                                                | 1549    |
