# Supplementary material for: A systematic review investigating the cumulative incidence of chronic kidney disease in young adults with impaired glucose tolerance
Source: PubMed Central journal article supplement (PMC4433064; doi:10.1186/s13643-015-0059-6), 2015-05-13
Supplement: 13643_2015_59_MOESM2_ESM.pdf [file 13643_2015_59_MOESM2_ESM.pdf]

## Additional file 2

### Data extraction form adapted from Hayden et al Framework

#### Abbreviation

|      |                                      |
|------|--------------------------------------|
| IGT  | Impaired Glucose Tolerance           |
| CKD  | Chronic Kidney Disease               |
| T2DM | Type 2 Diabetes                      |
| SCr  | Serum Creatinine                     |
| CrCl | Creatinine Clearance                 |
| ESRD | End Stage Renal Disease              |
| ACR  | Albumin Creatinine Ratio             |
| PCR  | Protein Creatinine Ratio             |
| EX   | Excluded                             |
| NR   | Not Reported                         |
| eGFR | Estimated Glomerular Filtration Rate |

#### Eligibility criteria for title and abstract screening phase

| Study design                                                                                                                                 | Assessment           | Comment |
|----------------------------------------------------------------------------------------------------------------------------------------------|----------------------|---------|
| Is it:<br>[1] A cohort study (Prospective or Retrospective)<br>[2] A case-control or nested case-control study                               | Yes<br>No<br>Unclear |         |
| <b>Population</b>                                                                                                                            |                      |         |
| [1] Were patients diagnosed with IGT?<br>[2] Were patients followed up for T2DM<br><br>NB: Please answer Yes if IGT diagnosed in a sub group | Yes<br>No<br>Unclear |         |
| Are patients aged (18-40) years<br><br>NB: Please answer Yes if mixed age population                                                         | Yes<br>No<br>Unclear |         |
|                                                                                                                                              |                      |         |

| Study design                                                                                                                                                                                                                                                                                                                                                                                                                                                                                                | Assessment                        | Comment                           |    |       |    |       |   |       |   |     |                      |  |
|-------------------------------------------------------------------------------------------------------------------------------------------------------------------------------------------------------------------------------------------------------------------------------------------------------------------------------------------------------------------------------------------------------------------------------------------------------------------------------------------------------------|-----------------------------------|-----------------------------------|----|-------|----|-------|---|-------|---|-----|----------------------|--|
| <b>Outcomes</b>                                                                                                                                                                                                                                                                                                                                                                                                                                                                                             |                                   |                                   |    |       |    |       |   |       |   |     |                      |  |
| <p>Did the study report any of the following outcome:</p> <table border="1" data-bbox="152 304 533 576"> <thead> <tr> <th>Stage</th> <th>eGFR (ml/min/1.73m<sup>2</sup>)</th> </tr> </thead> <tbody> <tr> <td>3A</td> <td>45-59</td> </tr> <tr> <td>3B</td> <td>30-44</td> </tr> <tr> <td>4</td> <td>15-29</td> </tr> <tr> <td>5</td> <td>&lt;15</td> </tr> </tbody> </table> <p>ESRD (stage 5)<br/> Albuminuria<br/> ACR - &gt;30mg/mmol<br/> PCR - &gt;45mg/mmol<br/> SCr measures<br/> CrCl measures</p> | Stage                             | eGFR (ml/min/1.73m <sup>2</sup> ) | 3A | 45-59 | 3B | 30-44 | 4 | 15-29 | 5 | <15 | Yes<br>No<br>Unclear |  |
| Stage                                                                                                                                                                                                                                                                                                                                                                                                                                                                                                       | eGFR (ml/min/1.73m <sup>2</sup> ) |                                   |    |       |    |       |   |       |   |     |                      |  |
| 3A                                                                                                                                                                                                                                                                                                                                                                                                                                                                                                          | 45-59                             |                                   |    |       |    |       |   |       |   |     |                      |  |
| 3B                                                                                                                                                                                                                                                                                                                                                                                                                                                                                                          | 30-44                             |                                   |    |       |    |       |   |       |   |     |                      |  |
| 4                                                                                                                                                                                                                                                                                                                                                                                                                                                                                                           | 15-29                             |                                   |    |       |    |       |   |       |   |     |                      |  |
| 5                                                                                                                                                                                                                                                                                                                                                                                                                                                                                                           | <15                               |                                   |    |       |    |       |   |       |   |     |                      |  |
| <b>Follow up</b>                                                                                                                                                                                                                                                                                                                                                                                                                                                                                            |                                   |                                   |    |       |    |       |   |       |   |     |                      |  |
| <p>Were the patients followed up and adequate measures taken</p> <p><b>NB:</b> Please answer Yes if adequate measure were taken and key characteristics described</p>                                                                                                                                                                                                                                                                                                                                       | Yes<br>No<br>Unclear              |                                   |    |       |    |       |   |       |   |     |                      |  |
| <b>Final decision (please tick)</b>                                                                                                                                                                                                                                                                                                                                                                                                                                                                         | Include<br>Exclude<br>Unclear     |                                   |    |       |    |       |   |       |   |     |                      |  |

### Exclusion criteria

| Reasons for exclusion of study from review (please circle where appropriate) |                                                                                                |
|------------------------------------------------------------------------------|------------------------------------------------------------------------------------------------|
| Methods                                                                      | Not a cohort/case-control study                                                                |
| Patients                                                                     | No IGT/no T2DM follow up/T2DM or Type 1 diabetes diagnosis /CKD /no (18 to 40 years) age group |
| Outcomes                                                                     | No relevant outcomes assessed<br>No data for relevant subgroup extractable                     |
| Follow up period                                                             | No follow up                                                                                   |
| Other                                                                        | Duplicate publication<br>Other                                                                 |

### Inclusion criteria

| Specific inclusion criteria (please include if answer is Yes to all questions below) |                      |
|--------------------------------------------------------------------------------------|----------------------|
| Eligibility criteria                                                                 |                      |
| Satisfaction of eligibility criteria                                                 | Yes<br>No<br>Unclear |
| <b>Effect sizes</b>                                                                  |                      |
| Is there sufficient reporting of statistics or data to calculate effect sizes        | Yes<br>No<br>Unclear |

### Organisation

| Organisational aspect |                                                                                                                   | Exclude            |  | Include |
|-----------------------|-------------------------------------------------------------------------------------------------------------------|--------------------|--|---------|
| <b>Reviewer/date:</b> |                                                                                                                   | <b>Checked by:</b> |  |         |
| Author/Year           |                                                                                                                   |                    |  |         |
| Journal/Source        |                                                                                                                   |                    |  |         |
| Country of origin     |                                                                                                                   |                    |  |         |
| Publication type      | Full text/Abstract/Book chapter/progress report/<br>Other – please specify                                        |                    |  |         |
| Fate                  | Decision pending/Check references/Use for discussion/EX without listing/EX with listing<br>Other – please specify |                    |  |         |
| Notes                 |                                                                                                                   |                    |  |         |

## Study characteristics

| General study characteristics (please circle where appropriate)   |                                                                                                                                                                                                                                                                                                                                                                                                                                                                                                                                                                                         |       |                                   |    |       |    |       |   |       |   |     |
|-------------------------------------------------------------------|-----------------------------------------------------------------------------------------------------------------------------------------------------------------------------------------------------------------------------------------------------------------------------------------------------------------------------------------------------------------------------------------------------------------------------------------------------------------------------------------------------------------------------------------------------------------------------------------|-------|-----------------------------------|----|-------|----|-------|---|-------|---|-----|
| Location of study                                                 |                                                                                                                                                                                                                                                                                                                                                                                                                                                                                                                                                                                         |       |                                   |    |       |    |       |   |       |   |     |
| Study aims                                                        | Reported/NR                                                                                                                                                                                                                                                                                                                                                                                                                                                                                                                                                                             |       |                                   |    |       |    |       |   |       |   |     |
| Dates of recruitment                                              | From _____ to _____<br>Median (range): #<br>Mean:#                                                                                                                                                                                                                                                                                                                                                                                                                                                                                                                                      |       |                                   |    |       |    |       |   |       |   |     |
| Length of follow up of CKD outcome + length of follow up of study | From _____ to _____<br>Median (range): #<br>Mean:#                                                                                                                                                                                                                                                                                                                                                                                                                                                                                                                                      |       |                                   |    |       |    |       |   |       |   |     |
| Outcomes assessed                                                 | <p>Did the study report any of the following outcome:</p> <table border="1"> <thead> <tr> <th>Stage</th> <th>eGFR (ml/min/1.73m<sup>2</sup>)</th> </tr> </thead> <tbody> <tr> <td>3A</td> <td>45-59</td> </tr> <tr> <td>3B</td> <td>30-44</td> </tr> <tr> <td>4</td> <td>15-29</td> </tr> <tr> <td>5</td> <td>&lt;15</td> </tr> </tbody> </table> <p>End Stage Renal Disease (stage 5)<br/>Albumin creatinine ratio - &gt;30mg/mmol<br/>Protein creatinine ratio - &gt;45mg/mmol<br/>Serum creatinine measures<br/>Creatinine clearance measures<br/>Other (<i>please specify</i>):</p> | Stage | eGFR (ml/min/1.73m <sup>2</sup> ) | 3A | 45-59 | 3B | 30-44 | 4 | 15-29 | 5 | <15 |
| Stage                                                             | eGFR (ml/min/1.73m <sup>2</sup> )                                                                                                                                                                                                                                                                                                                                                                                                                                                                                                                                                       |       |                                   |    |       |    |       |   |       |   |     |
| 3A                                                                | 45-59                                                                                                                                                                                                                                                                                                                                                                                                                                                                                                                                                                                   |       |                                   |    |       |    |       |   |       |   |     |
| 3B                                                                | 30-44                                                                                                                                                                                                                                                                                                                                                                                                                                                                                                                                                                                   |       |                                   |    |       |    |       |   |       |   |     |
| 4                                                                 | 15-29                                                                                                                                                                                                                                                                                                                                                                                                                                                                                                                                                                                   |       |                                   |    |       |    |       |   |       |   |     |
| 5                                                                 | <15                                                                                                                                                                                                                                                                                                                                                                                                                                                                                                                                                                                     |       |                                   |    |       |    |       |   |       |   |     |
| Outcome definition                                                |                                                                                                                                                                                                                                                                                                                                                                                                                                                                                                                                                                                         |       |                                   |    |       |    |       |   |       |   |     |
| Relationship between outcome and relevant factor                  | <p>Is the relationship statistically significant?<br/>Yes/No<br/>RR/OR: #</p> <p>If No, is it due to<br/>Low powered or inconclusive study/A true negative study</p>                                                                                                                                                                                                                                                                                                                                                                                                                    |       |                                   |    |       |    |       |   |       |   |     |
| Power calculation                                                 | <p>Yes/No/Not reported</p> <p>Calculated sample size: #<br/>Sample size achieved: Yes/No</p>                                                                                                                                                                                                                                                                                                                                                                                                                                                                                            |       |                                   |    |       |    |       |   |       |   |     |
| Funding                                                           | <p>Unclear<br/>NR<br/>Please state where reported</p>                                                                                                                                                                                                                                                                                                                                                                                                                                                                                                                                   |       |                                   |    |       |    |       |   |       |   |     |
| Conflict of interest statement                                    | Yes/No/NR                                                                                                                                                                                                                                                                                                                                                                                                                                                                                                                                                                               |       |                                   |    |       |    |       |   |       |   |     |

**Baseline characteristics of patients (please circle where appropriate)**

|                                                                                                                                                                                                                                      | Exposure               | Control          | Notes: any relationship with outcomes?<br>Yes/No/NR<br>If Yes please state if statistically significant and RR/OR values |                 |       |                |  |  |  |
|--------------------------------------------------------------------------------------------------------------------------------------------------------------------------------------------------------------------------------------|------------------------|------------------|--------------------------------------------------------------------------------------------------------------------------|-----------------|-------|----------------|--|--|--|
| Overall comment: Significant/In significant                                                                                                                                                                                          |                        |                  |                                                                                                                          |                 |       |                |  |  |  |
| Number of patients                                                                                                                                                                                                                   |                        |                  |                                                                                                                          |                 |       |                |  |  |  |
| Age range (if reported)<br>Mean                                                                                                                                                                                                      |                        |                  |                                                                                                                          |                 |       |                |  |  |  |
| Ethnicity<br>No%                                                                                                                                                                                                                     |                        |                  |                                                                                                                          |                 |       |                |  |  |  |
| Gender<br>No%                                                                                                                                                                                                                        | Male:<br>Female:       | Male:<br>Female: |                                                                                                                          |                 |       |                |  |  |  |
| No of patients screened for IGT                                                                                                                                                                                                      |                        |                  |                                                                                                                          |                 |       |                |  |  |  |
| No of patients recruited                                                                                                                                                                                                             |                        |                  |                                                                                                                          |                 |       |                |  |  |  |
| No of patients allocated                                                                                                                                                                                                             |                        |                  |                                                                                                                          |                 |       |                |  |  |  |
| No of patients evaluated                                                                                                                                                                                                             |                        |                  |                                                                                                                          |                 |       |                |  |  |  |
| No of dropouts                                                                                                                                                                                                                       |                        |                  |                                                                                                                          |                 |       |                |  |  |  |
| Reasons for dropouts                                                                                                                                                                                                                 |                        |                  |                                                                                                                          |                 |       |                |  |  |  |
|                                                                                                                                                                                                                                      |                        |                  |                                                                                                                          |                 |       |                |  |  |  |
| Number of protocol violations                                                                                                                                                                                                        |                        |                  |                                                                                                                          |                 |       |                |  |  |  |
|                                                                                                                                                                                                                                      |                        |                  |                                                                                                                          |                 |       |                |  |  |  |
| Definition of IGT                                                                                                                                                                                                                    |                        |                  |                                                                                                                          |                 |       |                |  |  |  |
| <table border="1"> <tr> <td>Fasting plasma glucose</td> <td>6.1-6.9 mmol/L</td> </tr> <tr> <td>Oral Glucose Tolerance test (2h value)</td> <td>7.8-11.0 mmol/L</td> </tr> <tr> <td>HbA1c</td> <td>42-47 mmol/mol</td> </tr> </table> | Fasting plasma glucose | 6.1-6.9 mmol/L   | Oral Glucose Tolerance test (2h value)                                                                                   | 7.8-11.0 mmol/L | HbA1c | 42-47 mmol/mol |  |  |  |
| Fasting plasma glucose                                                                                                                                                                                                               | 6.1-6.9 mmol/L         |                  |                                                                                                                          |                 |       |                |  |  |  |
| Oral Glucose Tolerance test (2h value)                                                                                                                                                                                               | 7.8-11.0 mmol/L        |                  |                                                                                                                          |                 |       |                |  |  |  |
| HbA1c                                                                                                                                                                                                                                | 42-47 mmol/mol         |                  |                                                                                                                          |                 |       |                |  |  |  |
| Please circle all that applies and list all                                                                                                                                                                                          |                        |                  |                                                                                                                          |                 |       |                |  |  |  |
| Status of patient at recruitment                                                                                                                                                                                                     |                        |                  |                                                                                                                          |                 |       |                |  |  |  |
| Any treatment for any comorbidities                                                                                                                                                                                                  |                        |                  |                                                                                                                          |                 |       |                |  |  |  |
| If treated:<br>Please state                                                                                                                                                                                                          |                        |                  |                                                                                                                          |                 |       |                |  |  |  |
| What treatment                                                                                                                                                                                                                       |                        |                  |                                                                                                                          |                 |       |                |  |  |  |
| Duration                                                                                                                                                                                                                             |                        |                  |                                                                                                                          |                 |       |                |  |  |  |
| Adverse event?<br>Yes/No                                                                                                                                                                                                             |                        |                  |                                                                                                                          |                 |       |                |  |  |  |
| <i>If Yes please state</i>                                                                                                                                                                                                           |                        |                  |                                                                                                                          |                 |       |                |  |  |  |

| Observational study characteristics (please circle where appropriate) |                                                                                        |
|-----------------------------------------------------------------------|----------------------------------------------------------------------------------------|
| Sample size                                                           |                                                                                        |
| Number of excluded patients                                           |                                                                                        |
| Recruitment method                                                    |                                                                                        |
| Type of observational study                                           | Cohort studies (retrospective/prospective)<br>Case-control studies/nested case-control |
| Are group comparable?                                                 | Yes/No<br><br>If No, please specify                                                    |
| Any confounders?                                                      | Yes/No<br><br>If No, please specify                                                    |
| Analysis                                                              |                                                                                        |
| Drop outs stated                                                      | Yes/No<br><br>If Yes: # in each group                                                  |

### Outcome details

The following table have to be copied for every relevant outcome assessed (*please fill out fields only where applicable*)

| Outcomes assessed (please state where relevant)            |  |
|------------------------------------------------------------|--|
| Definition of each outcome                                 |  |
| Time of assessment of each outcome (post IGT)              |  |
| Timing of assessment                                       |  |
| Length of follow up for each outcome                       |  |
| Method of measurement                                      |  |
| No of patients evaluated for each outcome, as stated above |  |

**Methodological quality summary for observational studies**

|                                                       |                  |             |                       |        |                   |
|-------------------------------------------------------|------------------|-------------|-----------------------|--------|-------------------|
| Reviewer/Date:                                        |                  | Checked by: |                       |        |                   |
| Contents (please refer to tables below for guidance)  | Yes              | Partly      | No                    | Unsure | Comments          |
| Study participation                                   |                  |             |                       |        |                   |
| Study attrition                                       |                  |             |                       |        |                   |
| Measurement of prognostic factors                     |                  |             |                       |        |                   |
| Measurement and controlling for confounding variables |                  |             |                       |        |                   |
| Measurement of outcomes                               |                  |             |                       |        |                   |
| Analysis approach                                     |                  |             |                       |        |                   |
| Summarised validity                                   | Low risk of bias |             | Moderate risk of bias |        | High risk of bias |
| Remarks:                                              |                  |             |                       |        |                   |
