# Supplementary material for: A systematic review investigating the cumulative incidence of chronic kidney disease in young adults with impaired glucose tolerance
Source: PubMed Central journal article supplement (PMC4433064; doi:10.1186/s13643-015-0059-6), 2015-05-13
Supplement: 13643_2015_59_MOESM3_ESM.pdf [file 13643_2015_59_MOESM3_ESM.pdf]

### Additional file 3

#### Quality assessment form adapted from the Ottawa-Newcastle scale (NOS) for assessing non-randomised studies

|                                            |                                                                                                                                                                                                                                                                                                                                                                                                                                                                                                                                                                                                                                                                  | Yes/No/Unclear         |                                   |   |     |                                        |                   |       |                  |    |       |   |       |   |     |  |
|--------------------------------------------|------------------------------------------------------------------------------------------------------------------------------------------------------------------------------------------------------------------------------------------------------------------------------------------------------------------------------------------------------------------------------------------------------------------------------------------------------------------------------------------------------------------------------------------------------------------------------------------------------------------------------------------------------------------|------------------------|-----------------------------------|---|-----|----------------------------------------|-------------------|-------|------------------|----|-------|---|-------|---|-----|--|
| Selection of participants                  | <p>[1] Was the inclusion/exclusion clearly described? (for example, age, diagnosis status, IGT)</p> <p>[2] Was inclusion/exclusion assessed using valid and reliable measures? (for example, if there are important inclusion/exclusion criteria that are not directly related to exposure and outcome and for which the accuracy of measurement may need scrutiny, e.g age)</p> <p>[3] Was recruitment strategy clearly described?</p> <p>[4] Did the investigators ensure that the exposed/unexposed group were comparable (for example, did they use stratification, matching or propensity Score)</p>                                                        |                        |                                   |   |     |                                        |                   |       |                  |    |       |   |       |   |     |  |
| Adequate description of study population   | <p>[1] Was study population well characterised?</p> <ul style="list-style-type: none"> <li>• Age</li> <li>• Sex</li> <li>• Ethnicity</li> <li>• Suitable definition of IGT</li> </ul>                                                                                                                                                                                                                                                                                                                                                                                                                                                                            |                        |                                   |   |     |                                        |                   |       |                  |    |       |   |       |   |     |  |
| Validated method for ascertaining exposure | <p>[1] Was the method used to ascertain exposure clearly defined?</p> <p>[2] Was a valid and reliable measure used to ascertain exposure? (For example what diagnostic test was used to confirm IGT)</p> <table border="1" style="width: 100%; border-collapse: collapse;"> <tbody> <tr> <td style="width: 60%;">Fasting Plasma Glucose</td> <td style="width: 40%;">6.1 – 6.9 mmol/L</td> </tr> <tr> <td> </td> <td> </td> </tr> <tr> <td>Oral Glucose Tolerance Test (2h value)</td> <td>7.8 – 11.0 mmol/L</td> </tr> <tr> <td>HbA1c</td> <td>42 – 47 mmol/mol</td> </tr> </tbody> </table>                                                                    | Fasting Plasma Glucose | 6.1 – 6.9 mmol/L                  |   |     | Oral Glucose Tolerance Test (2h value) | 7.8 – 11.0 mmol/L | HbA1c | 42 – 47 mmol/mol |    |       |   |       |   |     |  |
| Fasting Plasma Glucose                     | 6.1 – 6.9 mmol/L                                                                                                                                                                                                                                                                                                                                                                                                                                                                                                                                                                                                                                                 |                        |                                   |   |     |                                        |                   |       |                  |    |       |   |       |   |     |  |
|                                            |                                                                                                                                                                                                                                                                                                                                                                                                                                                                                                                                                                                                                                                                  |                        |                                   |   |     |                                        |                   |       |                  |    |       |   |       |   |     |  |
| Oral Glucose Tolerance Test (2h value)     | 7.8 – 11.0 mmol/L                                                                                                                                                                                                                                                                                                                                                                                                                                                                                                                                                                                                                                                |                        |                                   |   |     |                                        |                   |       |                  |    |       |   |       |   |     |  |
| HbA1c                                      | 42 – 47 mmol/mol                                                                                                                                                                                                                                                                                                                                                                                                                                                                                                                                                                                                                                                 |                        |                                   |   |     |                                        |                   |       |                  |    |       |   |       |   |     |  |
| Validated method to confirm outcome        | <p>[1] Was valid and reliable measures used to ascertain outcome? For example</p> <table border="1" style="width: 100%; border-collapse: collapse;"> <thead> <tr> <th style="width: 20%;">Stage</th> <th style="width: 80%;">eGFR (ml/min/1.73m<sup>2</sup>)</th> </tr> </thead> <tbody> <tr> <td>1</td> <td>≥90</td> </tr> <tr> <td>2</td> <td>60-89</td> </tr> <tr> <td>3A</td> <td>45-59</td> </tr> <tr> <td>3B</td> <td>30-44</td> </tr> <tr> <td>4</td> <td>15-29</td> </tr> <tr> <td>5</td> <td>&lt;15</td> </tr> </tbody> </table> <p>ACR - &gt;30mg/mmol<br/>           PCR - &gt;45mg/mmol<br/>           SCr measures<br/>           CrCl measures</p> | Stage                  | eGFR (ml/min/1.73m <sup>2</sup> ) | 1 | ≥90 | 2                                      | 60-89             | 3A    | 45-59            | 3B | 30-44 | 4 | 15-29 | 5 | <15 |  |
| Stage                                      | eGFR (ml/min/1.73m <sup>2</sup> )                                                                                                                                                                                                                                                                                                                                                                                                                                                                                                                                                                                                                                |                        |                                   |   |     |                                        |                   |       |                  |    |       |   |       |   |     |  |
| 1                                          | ≥90                                                                                                                                                                                                                                                                                                                                                                                                                                                                                                                                                                                                                                                              |                        |                                   |   |     |                                        |                   |       |                  |    |       |   |       |   |     |  |
| 2                                          | 60-89                                                                                                                                                                                                                                                                                                                                                                                                                                                                                                                                                                                                                                                            |                        |                                   |   |     |                                        |                   |       |                  |    |       |   |       |   |     |  |
| 3A                                         | 45-59                                                                                                                                                                                                                                                                                                                                                                                                                                                                                                                                                                                                                                                            |                        |                                   |   |     |                                        |                   |       |                  |    |       |   |       |   |     |  |
| 3B                                         | 30-44                                                                                                                                                                                                                                                                                                                                                                                                                                                                                                                                                                                                                                                            |                        |                                   |   |     |                                        |                   |       |                  |    |       |   |       |   |     |  |
| 4                                          | 15-29                                                                                                                                                                                                                                                                                                                                                                                                                                                                                                                                                                                                                                                            |                        |                                   |   |     |                                        |                   |       |                  |    |       |   |       |   |     |  |
| 5                                          | <15                                                                                                                                                                                                                                                                                                                                                                                                                                                                                                                                                                                                                                                              |                        |                                   |   |     |                                        |                   |       |                  |    |       |   |       |   |     |  |
| Adequate follow up period                  | <p>[1] Was follow up long enough for the outcome to occur?</p> <p>[2] Was the follow up period the same across all groups?</p> <p>[3] Were differences in follow-up adjusted for using statistical techniques, e.g., survival analysis?</p>                                                                                                                                                                                                                                                                                                                                                                                                                      |                        |                                   |   |     |                                        |                   |       |                  |    |       |   |       |   |     |  |
| Completeness of follow-up (Attrition)      | <p>[1] Were drop-out rates and reasons for drop-out similar across exposed and unexposed?</p> <p>[2] Were numbers of dropouts/withdrawals documented at</p>                                                                                                                                                                                                                                                                                                                                                                                                                                                                                                      |                        |                                   |   |     |                                        |                   |       |                  |    |       |   |       |   |     |  |

|                                   |                                                                                                                                                                                                                                                                                                                                                                                                                                                                                                                                     | Yes/No/Unclear |
|-----------------------------------|-------------------------------------------------------------------------------------------------------------------------------------------------------------------------------------------------------------------------------------------------------------------------------------------------------------------------------------------------------------------------------------------------------------------------------------------------------------------------------------------------------------------------------------|----------------|
|                                   | each time point?                                                                                                                                                                                                                                                                                                                                                                                                                                                                                                                    |                |
| Analysis controls for confounding | [1] Does the study identify and control for important confounding variables and effect modifiers?                                                                                                                                                                                                                                                                                                                                                                                                                                   |                |
| Sample size calculated            | <p>[1] Is the sample size adequate?</p> <p>[2] Did the study describe how the sample size was calculated?</p> <ul style="list-style-type: none"> <li>• Did the investigators conduct a power analysis to determine the adequacy of study group sizes for the outcome of interest?</li> <li>• Was the sample size large enough to detect differences in event or a significant OR/RR between groups?</li> </ul> <p>(For example, OR/RR increases of <math>\geq 1.5</math> or decrease of <math>\geq 0.67</math> between groups).</p> |                |
| Analytical appropriate methods    | <p>[1] Was the kind of analysis done appropriate for the kind of outcome data? For example,</p> <ul style="list-style-type: none"> <li>• Dichotomous – logistic regression, survival</li> <li>• Categorical – mixed model for categorical outcomes</li> <li>• Continuous – Mixed model, ANCOVA</li> </ul> <p>[2] Was loss to follow up accounted for in the analysis (For example, through sensitivity analysis)</p>                                                                                                                |                |
